# Supplementary material for: 〈ナ〉のモルフォロギー--世阿弥能《井筒》における対位法的〈原構造〉をめぐって
Source: Royal Society of Chemistry journal article supplement (doi:10.1039/c3nr33584d), 2010-02-01
Supplement: c3nr33584d.pdf [file c3nr33584d.pdf]

**Supporting Information**

**Synthesis and Stress Relaxation of**

**ZnO/Al Doped ZnO Core-Shell Nanowires**

Hong-Bo Wang<sup>a</sup>, Fei Ma<sup>a</sup>, Qian-Qian Li<sup>b</sup>, Ce-Zhou Dong<sup>b</sup>, Da-Yan Ma<sup>a\*</sup>,

Hong-Tao Wang<sup>b\*</sup> and Ke-Wei Xu<sup>a,c\*</sup>

\*Corresponding authors:

[kwxu@mail.xjtu.edu.cn](mailto:kwxu@mail.xjtu.edu.cn), [htw@zju.edu.cn](mailto:htw@zju.edu.cn) and [madayan@mail.xjtu.edu.cn](mailto:madayan@mail.xjtu.edu.cn)

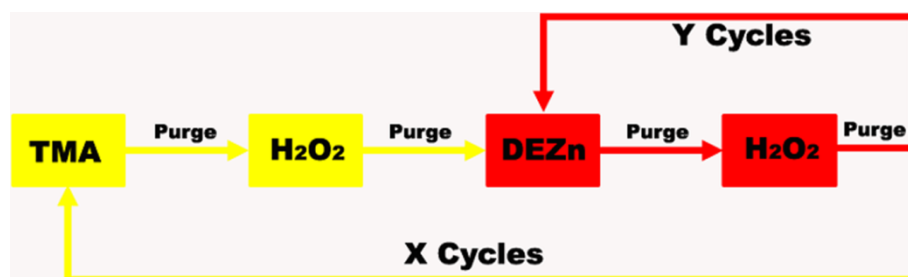

**Figure S1.** Schematic diagram of deposition process. X:Y was fixed at 1:20 in this work.

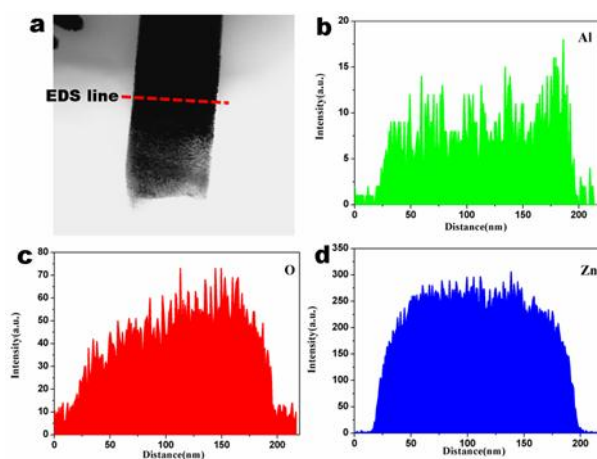

**Figure S2.** The distribution profiles of the element Zn, O and Al; Inset shows the location for the EDX line scan.

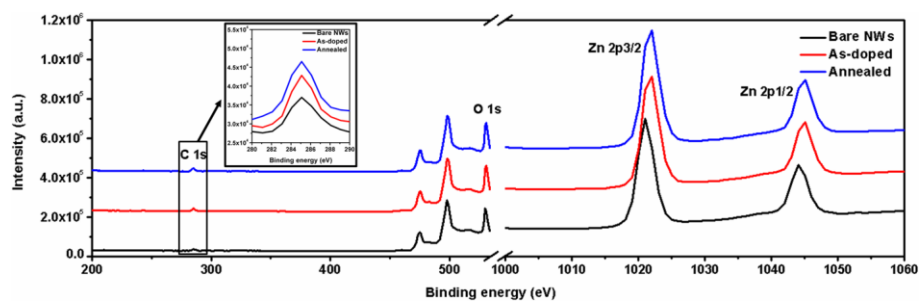

**Figure S3.** XPS curves after calibration by C1s at 284.6eV.
